# Supplementary material for: The GC-Rich Mitochondrial and Plastid Genomes of the Green Alga Coccomyxa Give Insight into the Evolution of Organelle DNA Nucleotide Landscape
Source: PubMed Central journal article supplement (PMC3162594; doi:10.1371/journal.pone.0023624), 2011-08-26

Figure S1

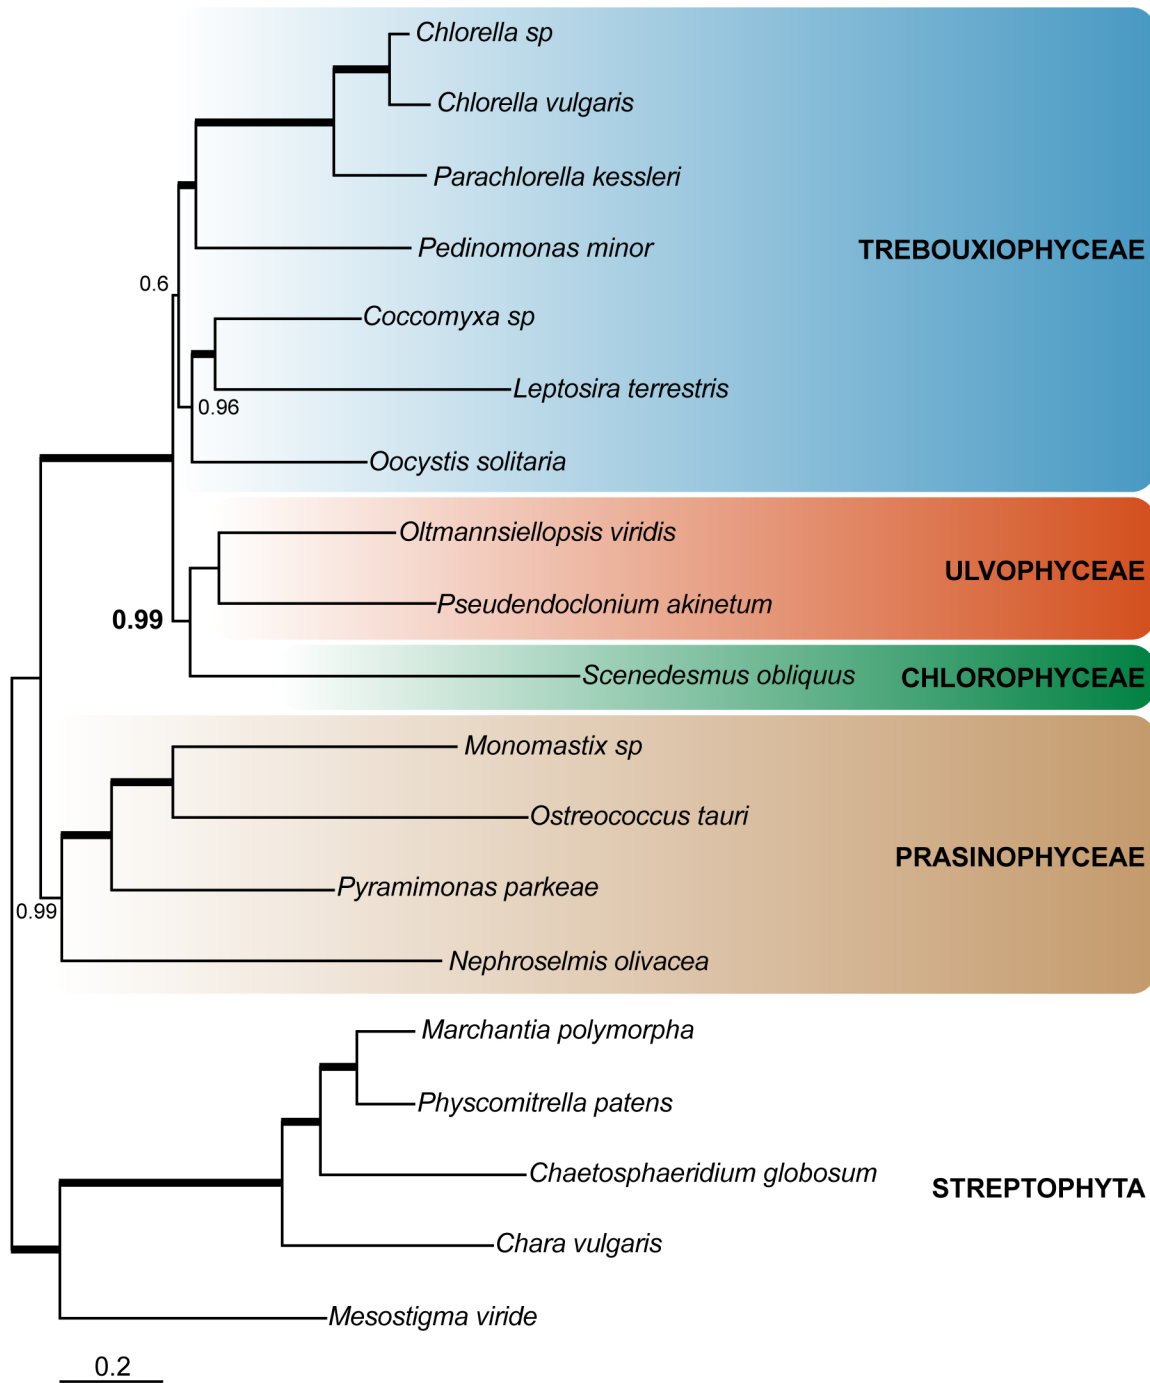

Supplement: pone.0023624.s001.pdf [file pone.0023624.s001.pdf]
