# Supplementary material for: The GC-Rich Mitochondrial and Plastid Genomes of the Green Alga Coccomyxa Give Insight into the Evolution of Organelle DNA Nucleotide Landscape
Source: PubMed Central journal article supplement (PMC3162594; doi:10.1371/journal.pone.0023624), 2011-08-26
Supplement: pone.0023624.s002.pdf [file pone.0023624.s002.pdf]

**Table S1.** Gene contents of available trebouxiophyte mitochondrial genomes

| <i>Coccomyxa</i> | <i>Helicosporidium</i> | <i>Prototheca wickerhamii</i> | <i>Pedinomonas minor</i> |
|------------------|------------------------|-------------------------------|--------------------------|
| <i>atp1</i>      | <i>atp1</i>            | <i>atp1</i>                   | —                        |
| <i>atp4</i>      | <i>atp4</i>            | <i>atp4</i>                   | —                        |
| <i>atp6</i>      | <i>atp6</i>            | <i>atp6</i>                   | <i>atp6</i>              |
| <i>atp8</i>      | <i>atp8</i>            | <i>atp8</i>                   | <i>atp8</i>              |
| <i>atp9</i>      | <i>atp9</i>            | <i>atp9</i>                   | —                        |
| <i>cob</i>       | <i>cob</i>             | <i>cob</i>                    | <i>cob</i>               |
| <i>cox1</i>      | <i>cox1</i>            | <i>cox1</i>                   | <i>cox1</i>              |
| <i>cox2</i>      | <i>cox2</i>            | <i>cox2</i>                   | —                        |
| <i>cox3</i>      | <i>cox3</i>            | <i>cox3</i>                   | —                        |
| <i>nad1</i>      | <i>nad1</i>            | <i>nad1</i>                   | <i>nad1</i>              |
| <i>nad2</i>      | <i>nad2</i>            | <i>nad2</i>                   | <i>nad2</i>              |
| <i>nad3</i>      | <i>nad3</i>            | <i>nad3</i>                   | <i>nad3</i>              |
| <i>nad4</i>      | <i>nad4</i>            | <i>nad4</i>                   | <i>nad4</i>              |
| <i>nad4L</i>     | <i>nad4L</i>           | <i>nad4L</i>                  | <i>nad4L</i>             |
| <i>nad5</i>      | <i>nad5</i>            | <i>nad5</i>                   | <i>nad5</i>              |
| <i>nad6</i>      | <i>nad6</i>            | <i>nad6</i>                   | <i>nad6</i>              |
| <i>nad7</i>      | <i>nad7</i>            | <i>nad7</i>                   | —                        |
| <i>nad9</i>      | <i>nad9</i>            | <i>nad9</i>                   | —                        |
| <i>rrn5</i>      | <i>rrn5</i>            | <i>rrn5</i>                   | —                        |
| <i>rrnL</i>      | <i>rrnL</i>            | <i>rrnL</i>                   | <i>rrnL</i>              |
| <i>rrnS</i>      | <i>rrnS</i>            | <i>rrnS</i>                   | <i>rrnS</i> (fragmented) |
| <i>rpl5</i>      | <i>rpl5</i>            | <i>rpl5</i>                   | —                        |
| —                | <i>rpl6</i>            | <i>rpl6</i>                   | —                        |
| <i>rpl16</i>     | <i>rpl16</i>           | <i>rpl16</i>                  | —                        |
| <i>rps2</i>      | <i>rps2</i>            | <i>rps2</i>                   | —                        |
| <i>rps3</i>      | <i>rps3</i>            | <i>rps3</i>                   | —                        |
| <i>rps4</i>      | <i>rps4</i>            | <i>rps4</i>                   | —                        |
| <i>rps7</i>      | <i>rps7</i>            | <i>rps7</i>                   | —                        |
| <i>rps10</i>     | <i>rps10</i>           | <i>rps10</i>                  | —                        |
| —                | <i>rps11</i>           | <i>rps11</i>                  | —                        |
| <i>rps12</i>     | <i>rps12</i>           | <i>rps12</i>                  | —                        |
| <i>rps13</i>     | <i>rps13</i>           | <i>rps13</i>                  | —                        |
| <i>rps14</i>     | <i>rps14</i>           | <i>rps14</i>                  | —                        |
| <i>rps19</i>     | <i>rps19</i>           | <i>rps19</i>                  | —                        |
| <i>tatC</i>      | <i>tatC</i>            | <i>tatC</i>                   | —                        |
| <i>trnA(ugc)</i> | <i>trnA(ugc)</i>       | <i>trnA(ugc)</i>              | —                        |
| <i>trnC(gca)</i> | <i>trnC(gca)</i>       | <i>trnC(gca)</i>              | <i>trnC(gca)</i>         |
| <i>trnD(guc)</i> | <i>trnD(guc)</i>       | <i>trnD(guc)</i>              | —                        |
| <i>trnE(uuc)</i> | <i>trnE(uuc)</i>       | <i>trnE(uuc)</i>              | <i>trnE(uuc)</i>         |
| <i>trnF(gaa)</i> | <i>trnF(gaa)</i>       | <i>trnF(gaa)</i>              | <i>trnF(gaa)</i>         |

| <i>Coccomyxa</i>  | <i>Helicosporidium</i> | <i>Prototheca wickerhamii</i> | <i>Pedinomonas minor</i> |
|-------------------|------------------------|-------------------------------|--------------------------|
| <i>trnG(gcc)</i>  | —                      | <i>trnG(gcc)</i>              | —                        |
| <i>trnG(ucc)</i>  | <i>trnG(ucc)</i>       | <i>trnG(ucc)</i>              | —                        |
| <i>trnH(gug)</i>  | <i>trnH(gug)</i>       | <i>trnH(gug)</i>              | <i>trnH(gug)</i>         |
| <i>trnI(gau)</i>  | <i>trnI(gau)</i>       | <i>trnI(gau)</i>              | —                        |
| <i>trnI(cau)</i>  | <i>trnI(cau)</i>       | <i>trnI(cau)</i>              | —                        |
| <i>trnK(uuu)</i>  | <i>trnK(uuu)</i>       | <i>trnK(uuu)</i>              | —                        |
| <i>trnL(caa)</i>  | <i>trnL(uaa)</i>       | <i>trnL(uaa)</i>              | <i>trnL(caa)</i>         |
| <i>trnL(uaa)</i>  | <i>trnL(uag)</i>       | <i>trnL(uag)</i>              | —                        |
| <i>trnL(uag)</i>  | —                      | —                             | —                        |
| <i>trnMe(cau)</i> | <i>trnMe(cau)</i>      | <i>trnMe(cau)</i>             | —                        |
| <i>trnMf(cau)</i> | <i>trnMf(cau)</i>      | <i>trnMf(cau)</i>             | —                        |
| <i>trnN(guu)</i>  | <i>trnN(guu)</i>       | <i>trnN(guu)</i>              | —                        |
| <i>trnP(ugg)</i>  | <i>trnP(ugg)</i>       | <i>trnP(ugg)</i>              | —                        |
| <i>trnQ(uug)</i>  | <i>trnQ(uug)</i>       | <i>trnQ(uug)</i>              | <i>trnQ(uug)</i>         |
| <i>trnR(ucu)</i>  | <i>trnR(ucu)</i>       | <i>trnR(ucu)</i>              | —                        |
| <i>trnR(acg)</i>  | <i>trnR(acg)</i>       | <i>trnR(acg)</i>              | —                        |
| <i>trnS(gcu)</i>  | <i>trnS(gcu)</i>       | <i>trnS(gcu)</i>              | —                        |
| <i>trnS(uga)</i>  | <i>trnS(uga)</i>       | <i>trnS(uga)</i>              | —                        |
| —                 | <i>trnT(ugu)</i>       | <i>trnT(ugu)</i>              | —                        |
| <i>trnV(uac)</i>  | <i>trnV(uac)</i>       | <i>trnV(uac)</i>              | —                        |
| <i>trnW(cca)</i>  | <i>trnW(cca)</i>       | <i>trnW(cca)</i>              | <i>trnW(uca)</i>         |
| <i>trnY(gua)</i>  | <i>trnY(gua)</i>       | <i>trnY(gua)</i>              | <i>trnY1(gua)</i>        |
| —                 | —                      | —                             | <i>trnY2(gua)</i>        |
