# Supplementary material for: The GC-Rich Mitochondrial and Plastid Genomes of the Green Alga Coccomyxa Give Insight into the Evolution of Organelle DNA Nucleotide Landscape
Source: PubMed Central journal article supplement (PMC3162594; doi:10.1371/journal.pone.0023624), 2011-08-26
Supplement: pone.0023624.s003.pdf [file pone.0023624.s003.pdf]

**Table S2.** Gene contents of available trebouxiophyte plastid genomes

| <i>Coccomyxa</i> | <i>Chlorella vulgaris</i> | <i>Helicosporidium</i> | <i>Parachlorella kessleri</i> | <i>Leptosira terrestris</i> | <i>Pedinomonas minor</i> |
|------------------|---------------------------|------------------------|-------------------------------|-----------------------------|--------------------------|
| <i>accD</i>      | <i>accD</i>               | <i>accD</i>            | <i>accD</i>                   | <i>accD</i>                 | <i>accD</i>              |
| <i>atpA</i>      | <i>atpA</i>               | —                      | <i>atpA</i>                   | <i>atpA</i>                 | <i>atpA</i>              |
| <i>atpB</i>      | <i>atpB</i>               | —                      | <i>atpB</i>                   | <i>atpB</i>                 | <i>atpB</i>              |
| <i>atpE</i>      | <i>atpE</i>               | —                      | <i>atpE</i>                   | <i>atpE</i>                 | <i>atpE</i>              |
| <i>atpF</i>      | <i>atpF</i>               | —                      | <i>atpF</i>                   | <i>atpF</i>                 | <i>atpF</i>              |
| <i>atpH</i>      | <i>atpH</i>               | —                      | <i>atpH</i>                   | <i>atpH</i>                 | <i>atpH</i>              |
| <i>atpI</i>      | <i>atpI</i>               | —                      | <i>atpI</i>                   | <i>atpI</i>                 | <i>atpI</i>              |
| <i>ccsA</i>      | <i>ccsA</i>               | —                      | <i>ccsA</i>                   | —                           | <i>ccsA</i>              |
| <i>cemA</i>      | <i>cemA</i>               | —                      | <i>cemA</i>                   | <i>cemA</i>                 | <i>cemA</i>              |
| <i>chlB</i>      | <i>chlB</i>               | —                      | <i>chlB</i>                   | <i>chlB</i>                 | —                        |
| <i>chlI</i>      | <i>chlI</i>               | —                      | <i>chlI</i>                   | —                           | <i>chlI</i>              |
| <i>chlL</i>      | <i>chlL</i>               | —                      | <i>chlL</i>                   | <i>chlL</i>                 | —                        |
| <i>chlN</i>      | <i>chlN</i>               | —                      | <i>chlN</i>                   | <i>chlN</i>                 | —                        |
| <i>clpP</i>      | <i>clpP</i>               | —                      | <i>clpP</i>                   | <i>clpP</i>                 | <i>clpP</i>              |
| <i>cysA</i>      | <i>cysA</i>               | —                      | <i>cysA</i>                   | <i>cysA</i>                 | <i>cysA</i>              |
| <i>cysT</i>      | <i>cysT</i>               | <i>cysT</i>            | <i>cysT</i>                   | <i>cysT</i>                 | <i>cysT</i>              |
| <i>ftsH</i>      | <i>ftsH</i>               | <i>ftsH</i>            | <i>ftsH</i>                   | <i>ftsH</i>                 | <i>ftsH</i>              |
| <i>infA</i>      | <i>infA</i>               | —                      | <i>infA</i>                   | <i>infA</i>                 | —                        |
| <i>minD</i>      | <i>minD</i>               | —                      | <i>minD</i>                   | <i>minD</i>                 | <i>minD</i>              |
| <i>petA</i>      | <i>petA</i>               | —                      | <i>petA</i>                   | <i>petA</i>                 | <i>petA</i>              |
| <i>petB</i>      | <i>petB</i>               | —                      | <i>petB</i>                   | <i>petB</i>                 | <i>petB</i>              |
| <i>petD</i>      | <i>petD</i>               | —                      | <i>petD</i>                   | <i>petD</i>                 | <i>petD</i>              |
| <i>petG</i>      | <i>petG</i>               | —                      | <i>petG</i>                   | <i>petG</i>                 | <i>petG</i>              |
| <i>petL</i>      | <i>petL</i>               | —                      | <i>petL</i>                   | <i>petL</i>                 | <i>petL</i>              |
| <i>psaA</i>      | <i>psaA</i>               | —                      | <i>psaA</i>                   | <i>psaA</i>                 | <i>psaA</i>              |



| <i>Coccomyxa</i>         | <i>Chlorella vulgaris</i> | <i>Helicosporidium</i> | <i>Parachlorella kessleri</i> | <i>Leptosira terrestris</i> | <i>Pedinomonas minor</i> |
|--------------------------|---------------------------|------------------------|-------------------------------|-----------------------------|--------------------------|
| <i>rpl20</i>             | <i>rpl20</i>              | <i>rpl20</i>           | <i>rpl20</i>                  | <i>rpl20</i>                | <i>rpl20</i>             |
| <i>rpl23</i>             | <i>rpl23</i>              | —                      | <i>rpl23</i>                  | <i>rpl23</i>                | <i>rpl23</i>             |
| <i>rpl32</i>             | <i>rpl32</i>              | <i>rpl32</i>           | <i>rpl32</i>                  | <i>rpl32</i>                | <i>rpl32</i>             |
| <i>rpl36</i>             | <i>rpl36</i>              | <i>rpl36</i>           | <i>rpl36</i>                  | <i>rpl36</i>                | <i>rpl36</i>             |
| <i>rpl5</i>              | <i>rpl5</i>               | <i>rpl5</i>            | <i>rpl5</i>                   | <i>rpl5</i>                 | <i>rpl5</i>              |
| <i>rpoA</i>              | <i>rpoA</i>               | <i>rpoA</i>            | <i>rpoA</i>                   | <i>rpoA</i>                 | <i>rpoA</i>              |
| <i>rpoB</i>              | <i>rpoB</i>               | <i>rpoB</i>            | <i>rpoB</i>                   | <i>rpoBa</i>                | <i>rpoB</i>              |
| —                        | —                         | —                      | —                             | <i>rpoBb</i>                | —                        |
| <i>rpoC1</i>             | <i>rpoC1</i>              | <i>rpoC1</i>           | <i>rpoC1</i>                  | <i>rpoC1</i>                | <i>rpoC1</i>             |
| <i>rpoC2</i>             | <i>rpoC2</i>              | <i>rpoC2</i>           | <i>rpoC2</i>                  | <i>rpoC2</i>                | <i>rpoC2</i>             |
| <i>rps11</i>             | <i>rps11</i>              | <i>rps11</i>           | <i>rps11</i>                  | <i>rps11</i>                | <i>rps11</i>             |
| <i>rps12</i>             | <i>rps12</i>              | <i>rps12</i>           | <i>rps12</i>                  | <i>rps12</i>                | <i>rps12</i>             |
| <i>rps14</i>             | <i>rps14</i>              | <i>rps14</i>           | <i>rps14</i>                  | <i>rps14</i>                | <i>rps14</i>             |
| <i>rps18</i>             | <i>rps18</i>              | —                      | <i>rps18</i>                  | <i>rps18</i>                | <i>rps18</i>             |
| <i>rps19</i>             | <i>rps19</i>              | <i>rps19</i>           | <i>rps19</i>                  | <i>rps19</i>                | <i>rps19</i>             |
| <i>rps2</i>              | <i>rps2</i>               | —                      | <i>rps2</i>                   | <i>rps2</i>                 | <i>rps2</i>              |
| <i>rps3</i>              | <i>rps3</i>               | <i>rps3</i>            | <i>rps3</i>                   | <i>rps3</i>                 | <i>rps3</i>              |
| <i>rps4</i>              | <i>rps4</i>               | <i>rps4</i>            | <i>rps4</i>                   | <i>rps4</i>                 | <i>rps4</i>              |
| <i>rps7</i>              | <i>rps7</i>               | <i>rps7</i>            | <i>rps7</i>                   | <i>rps7</i>                 | <i>rps7</i>              |
| <i>rps8</i>              | <i>rps8</i>               | <i>rps8</i>            | <i>rps8</i>                   | <i>rps8</i>                 | <i>rps8</i>              |
| <i>rps9</i>              | <i>rps9</i>               | —                      | <i>rps9</i>                   | <i>rps9</i>                 | <i>rps9</i>              |
| <i>rrn5</i>              | <i>rrn5</i>               | <i>rrn5</i>            | <i>rrn5</i>                   | <i>rrn5</i>                 | <i>rrn5</i>              |
| <i>rrnL</i>              | <i>rrnL</i>               | <i>rrnL</i>            | <i>rrnL</i>                   | <i>rrnL</i>                 | <i>rrnL</i>              |
| <i>rrnS</i>              | <i>rrnS</i>               | <i>rrnS</i>            | <i>rrnS</i>                   | <i>rrnS</i>                 | <i>rrnS</i>              |
| <i>tilS (fragment 1)</i> | <i>tilS</i>               | <i>tilS</i>            | <i>tilS</i>                   | <i>tilS</i>                 | —                        |
| <i>tilS (fragment 2)</i> | —                         | —                      | —                             | —                           | —                        |

| <i>Coccomyxa</i>  | <i>Chlorella vulgaris</i> | <i>Helicosporidium</i> | <i>Parachlorella kessleri</i> | <i>Leptosira terrestris</i> | <i>Pedinomonas minor</i> |
|-------------------|---------------------------|------------------------|-------------------------------|-----------------------------|--------------------------|
| <i>trnA(ugc)</i>  | <i>trnA(ugc)</i>          | <i>trnA(ugc)</i>       | <i>trnA(ugc)</i>              | <i>trnA(ugc)</i>            | <i>trnA(ugc)</i>         |
| <i>trnC(gca)</i>  | <i>trnC(gca)</i>          | <i>trnC(gca)</i>       | <i>trnC(gca)</i>              | <i>trnC(gca)</i>            | <i>trnC(gca)</i>         |
| <i>trnD(guc)</i>  | <i>trnD(guc)</i>          | <i>trnD(guc)</i>       | <i>trnD(guc)</i>              | <i>trnD(guc)</i>            | <i>trnD(guc)</i>         |
| <i>trnE(uuc)</i>  | <i>trnE(uuc)</i>          | <i>trnE(uuc)</i>       | <i>trnE(uuc)</i>              | <i>trnE(uuc)</i>            | <i>trnE(uuc)</i>         |
| <i>trnF(gaa)</i>  | <i>trnF(gaa)</i>          | <i>trnF(gaa)</i>       | <i>trnF(gaa)</i>              | <i>trnF(gaa)</i>            | <i>trnF(gaa)</i>         |
| <i>trnG(ucc)</i>  | <i>trnG(ucc)</i>          | <i>trnG(ucc)</i>       | <i>trnG(gcc)</i>              | <i>trnG(gcc)</i>            | <i>trnG(gcc)</i>         |
| —                 | <i>trnG(gcc)</i>          | —                      | <i>trnG(ucc)</i>              | <i>trnG(ucc)</i>            | <i>trnG(ucc)</i>         |
| —                 | <i>trnG(gcc)</i>          | —                      | —                             | —                           | —                        |
| <i>trnH(gug)</i>  | <i>trnH(gug)</i>          | <i>trnH(gug)</i>       | <i>trnH(gug)</i>              | <i>trnH(gug)</i>            | <i>trnH(gug)</i>         |
| <i>trnI(gau)</i>  | <i>trnI(gau)</i>          | <i>trnI(gau)</i>       | <i>trnI(gau)</i>              | <i>trnI(gau)</i>            | <i>trnI(gau)</i>         |
| <i>trnI(cau)</i>  | <i>trnI(cau)</i>          | <i>trnI(cau)</i>       | <i>trnI(cau)</i>              | <i>trnI(cau)</i>            | —                        |
| <i>trnK(uuu)</i>  | <i>trnK(uuu)</i>          | <i>trnK(uuu)</i>       | <i>trnK(uuu)</i>              | <i>trnK(uuu)</i>            | <i>trnK(uuu)</i>         |
| <i>trnL(caa)</i>  | <i>trnL(caa)</i>          | <i>trnL(uaa)</i>       | <i>trnL(caa)</i>              | <i>trnL(caa)</i>            | —                        |
| <i>trnL(gag)</i>  | <i>trnL(gag)</i>          | —                      | <i>trnL(gag)</i>              | —                           | —                        |
| <i>trnL(uaa)</i>  | —                         | —                      | <i>trnL(uaa)</i>              | <i>trnL(uaa)</i>            | <i>trnL(uaa)</i>         |
| <i>trnL(uag)</i>  | <i>trnL(uag)</i>          | <i>trnL(uag)</i>       | <i>trnL(uag)</i>              | <i>trnL(uag)</i>            | <i>trnL(uag)</i>         |
| <i>trnMe(cau)</i> | <i>trnMe(cau)</i>         | <i>trnMe(cau)</i>      | <i>trnMe(cau)</i>             | <i>trnMe(cau)</i>           | <i>trnMe(cau)</i>        |
| <i>trnMf(cau)</i> | <i>trnMf(cau)</i>         | <i>trnMf(cau)</i>      | <i>trnMf(cau)</i>             | <i>trnMf(cau)</i>           | <i>trnMf(cau)</i>        |
| <i>trnN(guu)</i>  | <i>trnN(guu)</i>          | <i>trnN(guu)</i>       | <i>trnN(guu)</i>              | <i>trnN(guu)</i>            | <i>trnN(guu)</i>         |
| <i>trnP(ugg)</i>  | <i>trnP(ugg)</i>          | <i>trnP(ugg)</i>       | <i>trnP(ugg)</i>              | <i>trnP(ugg)</i>            | <i>trnP(ugg)</i>         |
| <i>trnQ(uug)</i>  | <i>trnQ(uug)</i>          | <i>trnQ(uug)</i>       | <i>trnQ(uug)</i>              | <i>trnQ(uug)</i>            | <i>trnQ(uug)</i>         |
| <i>trnR(acg)</i>  | <i>trnR(acg)</i>          | <i>trnR(acg)</i>       | <i>trnR(acg)</i>              | <i>trnR(acg)</i>            | <i>trnR(acg)</i>         |
| <i>trnR(ucu)</i>  | <i>trnR(ucu)</i>          | <i>trnR(ucu)</i>       | <i>trnR(ucu)</i>              | <i>trnR(ucu)</i>            | <i>trnR(ucu)</i>         |
| <i>trnR(ccg)</i>  | <i>trnR(ccg)</i>          | —                      | —                             | <i>trnR(ccg)</i>            | <i>trnR(ccg)</i>         |
| <i>trnR(ccu)</i>  | —                         | —                      | —                             | —                           | —                        |
| <i>trnS(gcu)</i>  | <i>trnS(gcu)</i>          | —                      | <i>trnS(gcu)</i>              | <i>trnS(gcu)</i>            | <i>trnS(gcu)</i>         |

| <i>Coccomyxa</i> | <i>Chlorella vulgaris</i> | <i>Helicosporidium</i> | <i>Parachlorella kessleri</i> | <i>Leptosira terrestris</i> | <i>Pedinomonas minor</i> |
|------------------|---------------------------|------------------------|-------------------------------|-----------------------------|--------------------------|
| <i>trnS(gga)</i> | <i>trnS(gga)</i>          | <i>trnS(uga)</i>       | <i>trnS(gga)</i>              | —                           | <i>trnS(gga)</i>         |
| <i>trnS(uga)</i> | <i>trnS(uga)</i>          | <i>trnS(gcu)</i>       | <i>trnS(uga)</i>              | <i>trnS(uga)</i>            | <i>trnS(uga)</i>         |
| <i>trnT(ugu)</i> | <i>trnT(ugu)</i>          | <i>trnT(ugu)</i>       | <i>trnT(ggu)</i>              | <i>trnT(ugu)</i>            | <i>trnT(ggu)</i>         |
| <i>trnT(ggu)</i> | <i>trnT(ggu)</i>          | —                      | <i>trnT(ugu)</i>              | —                           | <i>trnT(ugu)</i>         |
| <i>trnV(uac)</i> | <i>trnV(uac)</i>          | <i>trnV(uac)</i>       | <i>trnV(uac)</i>              | <i>trnV(uac)</i>            | <i>trnV(uac)</i>         |
| —                | <i>trnV(uac)</i>          | —                      | —                             | —                           | —                        |
| <i>trnW(cca)</i> | <i>trnW(cca)</i>          | <i>trnW(cca)</i>       | <i>trnW(cca)</i>              | <i>trnW(cca)</i>            | <i>trnW(cca)</i>         |
| <i>trnY(gua)</i> | <i>trnY(gua)</i>          | <i>trnY(gua)</i>       | <i>trnY(gua)</i>              | <i>trnY(gua)</i>            | <i>trnY(gua)</i>         |
| <i>tufA</i>      | <i>tufA</i>               | <i>tufA</i>            | <i>tufA</i>                   | <i>tufA</i>                 | <i>tufA</i>              |
| <i>ycf1</i>      | <i>ycf1</i>               | <i>ycf1</i>            | <i>ycf1</i>                   | <i>ycf1</i>                 | <i>ycf1</i>              |
| <i>ycf12</i>     | <i>ycf12</i>              | —                      | <i>ycf12</i>                  | —                           | <i>ycf12</i>             |
| <i>ycf20</i>     | <i>ycf20</i>              | —                      | <i>ycf20</i>                  | <i>ycf20</i>                | <i>ycf20</i>             |
| <i>ycf3</i>      | <i>ycf3</i>               | —                      | <i>ycf3</i>                   | <i>ycf3</i>                 | <i>ycf3</i>              |
| <i>ycf4</i>      | <i>ycf4</i>               | —                      | <i>ycf4</i>                   | <i>ycf4</i>                 | <i>ycf4</i>              |
| <i>ycf47</i>     | <i>ycf47</i>              | —                      | <i>ycf47</i>                  | —                           | <i>ycf47</i>             |

Genes in the inverted repeat are shown once.
