# Supplementary material for: The GC-Rich Mitochondrial and Plastid Genomes of the Green Alga Coccomyxa Give Insight into the Evolution of Organelle DNA Nucleotide Landscape
Source: PubMed Central journal article supplement (PMC3162594; doi:10.1371/journal.pone.0023624), 2011-08-26
Supplement: pone.0023624.s004.pdf [file pone.0023624.s004.pdf]

**Amino acid composition of proteins encoded in complete mitochondrial genomes from trebouxiophytes**

| <b>Amino acid</b> | <b>Coccomyxa C-169</b> | <b>Prototheca wickerhamii</b> | <b>Helicosporidium sp.</b> | <b>Pedinomonas minor</b> |
|-------------------|------------------------|-------------------------------|----------------------------|--------------------------|
| A                 | 7.70%                  | 6.60%                         | 6.10%                      | 4.60%                    |
| C                 | 1.10%                  | 1.50%                         | 1.20%                      | 0.70%                    |
| D                 | 2.90%                  | 3.20%                         | 3.00%                      | 2.30%                    |
| E                 | 4.00%                  | 3.40%                         | 3.50%                      | 2.00%                    |
| F                 | 6.40%                  | 6.90%                         | 7.40%                      | 13.60%                   |
| G                 | 7.40%                  | 5.80%                         | 5.40%                      | 5.50%                    |
| H                 | 2.10%                  | 2.00%                         | 2.10%                      | 1.40%                    |
| I                 | 6.60%                  | 8.60%                         | 9.50%                      | 11.80%                   |
| K                 | 4.00%                  | 5.80%                         | 6.20%                      | 2.50%                    |
| L                 | 13.30%                 | 11.80%                        | 13.00%                     | 16.60%                   |
| M                 | 2.60%                  | 2.50%                         | 2.50%                      | 1.50%                    |
| N                 | 2.70%                  | 4.80%                         | 5.50%                      | 4.90%                    |
| P                 | 4.50%                  | 3.60%                         | 3.60%                      | 2.60%                    |
| Q                 | 3.40%                  | 3.20%                         | 3.20%                      | 1.50%                    |
| R                 | 5.60%                  | 3.80%                         | 3.40%                      | 1.70%                    |
| S                 | 8.00%                  | 8.30%                         | 7.50%                      | 8.60%                    |
| T                 | 4.80%                  | 4.80%                         | 5.00%                      | 4.00%                    |
| V                 | 7.40%                  | 7.00%                         | 5.40%                      | 7.30%                    |
| W                 | 1.70%                  | 1.40%                         | 1.20%                      | 1.80%                    |
| Y                 | 3.50%                  | 4.60%                         | 4.90%                      | 4.90%                    |
| <b>GC content</b> | <b>53.20%</b>          | <b>25.80%</b>                 | <b>25.60%</b>              | <b>22.20%</b>            |
