# Supplementary material for: The GC-Rich Mitochondrial and Plastid Genomes of the Green Alga Coccomyxa Give Insight into the Evolution of Organelle DNA Nucleotide Landscape
Source: PubMed Central journal article supplement (PMC3162594; doi:10.1371/journal.pone.0023624), 2011-08-26
Supplement: pone.0023624.s005.pdf [file pone.0023624.s005.pdf]

**Amino acid composition of proteins encoded in complete plastid genomes from trebouxiophytes**

| <b>Amino acid</b> | <b><i>Coccomyxa</i> C-169</b> | <b><i>Pedinomonas</i> minor</b> | <b><i>Chlorella</i> variabilis</b> | <b><i>Parachlorella</i> kessleri</b> | <b><i>Leptosira</i> terrestris</b> | <b><i>Helicosporidium</i> sp.</b> |
|-------------------|-------------------------------|---------------------------------|------------------------------------|--------------------------------------|------------------------------------|-----------------------------------|
| A                 | 8.40%                         | 7.00%                           | 6.60%                              | 6.20%                                | 5.70%                              | 4.00%                             |
| C                 | 0.90%                         | 0.80%                           | 0.90%                              | 1.00%                                | 1.00%                              | 0.90%                             |
| D                 | 4.00%                         | 3.70%                           | 3.80%                              | 3.60%                                | 3.50%                              | 3.30%                             |
| E                 | 5.40%                         | 5.60%                           | 5.50%                              | 5.00%                                | 4.50%                              | 4.90%                             |
| F                 | 4.60%                         | 5.80%                           | 6.00%                              | 6.20%                                | 5.80%                              | 6.80%                             |
| G                 | 8.30%                         | 6.80%                           | 6.90%                              | 6.70%                                | 5.70%                              | 4.50%                             |
| H                 | 2.10%                         | 1.90%                           | 1.90%                              | 2.00%                                | 2.10%                              | 1.70%                             |
| I                 | 5.50%                         | 6.60%                           | 6.70%                              | 7.60%                                | 7.90%                              | 10.20%                            |
| K                 | 4.40%                         | 5.70%                           | 6.40%                              | 6.70%                                | 7.80%                              | 10.80%                            |
| L                 | 10.60%                        | 11.20%                          | 10.90%                             | 10.50%                               | 10.60%                             | 11.30%                            |
| M                 | 2.10%                         | 2.00%                           | 1.90%                              | 1.80%                                | 1.90%                              | 1.50%                             |
| N                 | 3.50%                         | 4.60%                           | 4.20%                              | 5.30%                                | 6.40%                              | 8.00%                             |
| P                 | 5.30%                         | 4.20%                           | 4.40%                              | 4.20%                                | 4.10%                              | 3.50%                             |
| Q                 | 4.40%                         | 4.40%                           | 4.60%                              | 4.40%                                | 4.80%                              | 3.00%                             |
| R                 | 6.40%                         | 5.00%                           | 5.30%                              | 4.80%                                | 4.60%                              | 3.90%                             |
| S                 | 7.10%                         | 7.10%                           | 6.70%                              | 6.80%                                | 6.90%                              | 7.30%                             |
| T                 | 5.50%                         | 5.90%                           | 5.90%                              | 5.70%                                | 5.80%                              | 4.80%                             |
| V                 | 7.00%                         | 6.70%                           | 6.60%                              | 6.20%                                | 5.50%                              | 3.60%                             |
| W                 | 1.50%                         | 1.50%                           | 1.50%                              | 1.50%                                | 1.20%                              | 0.90%                             |
| Y                 | 2.60%                         | 3.00%                           | 3.00%                              | 3.30%                                | 3.70%                              | 4.90%                             |
| <b>GC content</b> | <b>50.70%</b>                 | <b>34.80%</b>                   | <b>34.00%</b>                      | <b>30.00%</b>                        | <b>27.30%</b>                      | <b>26.90%</b>                     |
