# Supplementary material for: The GC-Rich Mitochondrial and Plastid Genomes of the Green Alga Coccomyxa Give Insight into the Evolution of Organelle DNA Nucleotide Landscape
Source: PLoS One. 2011 Aug 26;6(8):e23624. doi: 10.1371/journal.pone.0023624 (PMC3162594; doi:10.1371/journal.pone.0023624)
Supplement: Table S5 — Gene and species lists for the mitochondrial and chloroplast datasets (XLSX) [file pone.0023624.s006.xlsx]

## Sheet: 29genes_15otus.stat.txt
Mitochondrial dataset: 29 genes / 15 taxa
	atp1	atp6	atp8	atp9	cob	cox1	cox2	cox3	nad1	nad2	nad3	nad4	nad4L	nad5	nad6	nad7	nad9	rpl16	rpl5	rps10	rps11	rps12	rps13	rps14	rps19	rps2	rps3	rps4	rps7	% miss. pos.	% miss. genes
Chaetosphaeridium globosum																														0	0
Chara vulgaris																														2	3
Chlorokybus atmophyticus																														0	0
Coccomyxa sp																														2	3
Helicosporidium sp																														0	0
Marchantia polymorpha																														7	3
Mesostigma viride																														0	0
Nephroselmis olivacea																														0	0
Oltmannsiellopsis viridis																														4	14
Ostreococcus tauri																														0	0
Pedinomonas minor																														46	62
Physcomitrella patens																														1	3
Prototheca wickerhamii																														0	0
Pseudendoclonium akinetum																														5	7
Scenedesmus obliquus																														38	55
% missing positions	13	0	7	7	0	0	7	7	0	0	0	0	0	0	0	20	20	13	20	27	20	13	20	13	13	13	13	20	27
% missing taxa	13	0	7	7	0	0	7	7	0	0	0	0	0	0	0	20	20	13	20	27	20	13	20	13	13	13	13	20	27
sequence length	482	208	42	71	351	485	118	255	282	315	110	403	94	473	132	387	152	114	22	64	104	104	100	82	60	90	100	48	96
Chloroplast dataset: 67 genes / 25 taxa
	atpA	atpB	atpE	atpF	atpH	atpI	ccsA	cemA	chlB	chlL	chlN	clpP	ftsH	infA	petA	petB	petD	petG	petL	psaA	psaB	psaC	psaI	psaJ	psaM	psbA	psbB	psbC	psbD	psbE	psbF	psbH	psbI	psbJ	psbK	psbL	psbM	psbN	psbT	psbZ	rbcL	rpl14	rpl16	rpl2	rpl20	rpl23	rpl32	rpl36	rpl5
Bryopsis hypnoides
Chaetosphaeridium globosum
Chara vulgaris
Chlamydomonas reinhardtii
Chlorella sp
Chlorella vulgaris
Coccomyxa sp
Floydiella terrestris
Leptosira terrestris
Marchantia polymorpha
Mesostigma viride
Monomastix sp
Nephroselmis olivacea
Oedogonium cardiacum
Oltmannsiellopsis viridis
Oocystis solitaria
Ostreococcus tauri
Parachlorella kessleri
Pedinomonas minor
Physcomitrella patens
Pseudendoclonium akinetum
Pycnococcus provasolii
Pyramimonas parkeae
Scenedesmus obliquus
Stigeoclonium helveticum
% missing positions	0	0	0	0	0	0	16	12	20	16	20	0	24	12	12	0	8	0	16	0	0	4	24	4	20	0	4	0	0	0	0	0	0	0	0	0	12	0	0	4	0	0	0	0	0	0	12	0	8
% missing taxa	0	0	0	0	0	0	16	12	20	16	20	0	24	12	12	0	8	0	16	0	0	4	24	4	20	0	4	0	0	0	0	0	0	0	0	0	12	0	0	4	0	0	0	0	0	0	12	0	8
sequence length	487	465	107	149	55	228	208	196	480	267	182	190	109	51	266	215	160	33	20	662	727	81	23	41	28	337	409	455	340	80	34	61	33	37	39	38	31	40	30	62	474	115	131	264	109	68	32	35	163
Green cells represent the presence of a gene in a given species
Black cells represent the absence of a gene
[truncated: 20 more columns]
